# Supplementary material for: Trap-controlled sodalites with high photochromic contrast for decoration applications
Source: Royal Society of Chemistry journal article supplement (doi:10.1039/d4tc05351f), 2025-01-01
Supplement: d4tc05351f1.pdf [file d4tc05351f1.pdf]

## Supporting information for

# Trap-Controlled Sodalites with High Photochromic Contrast for Decoloration Applications

Jingxuan Zhang <sup>a</sup>, Zetian Yang <sup>b\*</sup>, Hengwei Lin <sup>a</sup>, Dirk Poelman <sup>c</sup>, Henk Vrielinck <sup>d</sup>, and  
Jiaren Du <sup>a\*</sup>

<sup>a</sup> International Joint Research Center for Photo-responsive Molecules and Materials, School of  
Chemical and Material Engineering, Jiangnan University, 214122, Wuxi, China

<sup>b</sup> Aviation Engineering School, Air Force Engineering University, 710038, Xi'an, China

<sup>c</sup> LumiLab, Department of Solid State Sciences, Ghent University, Krijgslaan 281-S1, Ghent  
B-9000, Belgium

<sup>d</sup> Electron Magnetic Resonance Group, Department of Solid State Sciences, Ghent University,  
Krijgslaan 281-S1, Ghent B-9000, Belgium

\*Corresponding authors:

Dr. Jiaren Du ([jiaren.du@jiangnan.edu.cn](mailto:jiaren.du@jiangnan.edu.cn))

Dr. Zetian Yang ([zetianyang@126.com](mailto:zetianyang@126.com))

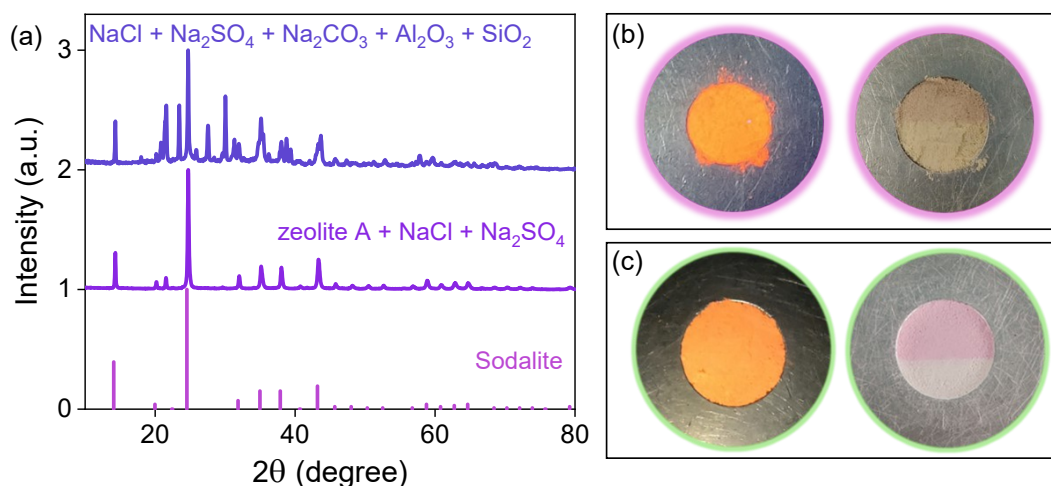

**Figure S1.** (a) XRD patterns of synthesized  $\text{Na}_8(\text{AlSiO}_4)_6\text{Cl}_2$  by microwave-assisted solid-state (MASS) reactions using different precursors. (b) Photographs of synthesized  $\text{Na}_8(\text{AlSiO}_4)_6\text{Cl}_2$  using  $\text{NaCl}$ ,  $\text{Na}_2\text{SO}_4$ ,  $\text{Na}_2\text{CO}_3$ ,  $\text{Al}_2\text{O}_3$  and  $\text{SiO}_2$  as precursors under 365 nm illumination (left) and after 254 nm coloring (right). (c) Photographs of synthesized  $\text{Na}_8(\text{AlSiO}_4)_6\text{Cl}_2$  using zeolite A,  $\text{NaCl}$  and  $\text{Na}_2\text{SO}_4$  as precursors under 365 nm illumination (left) and after 254 nm coloring (right).

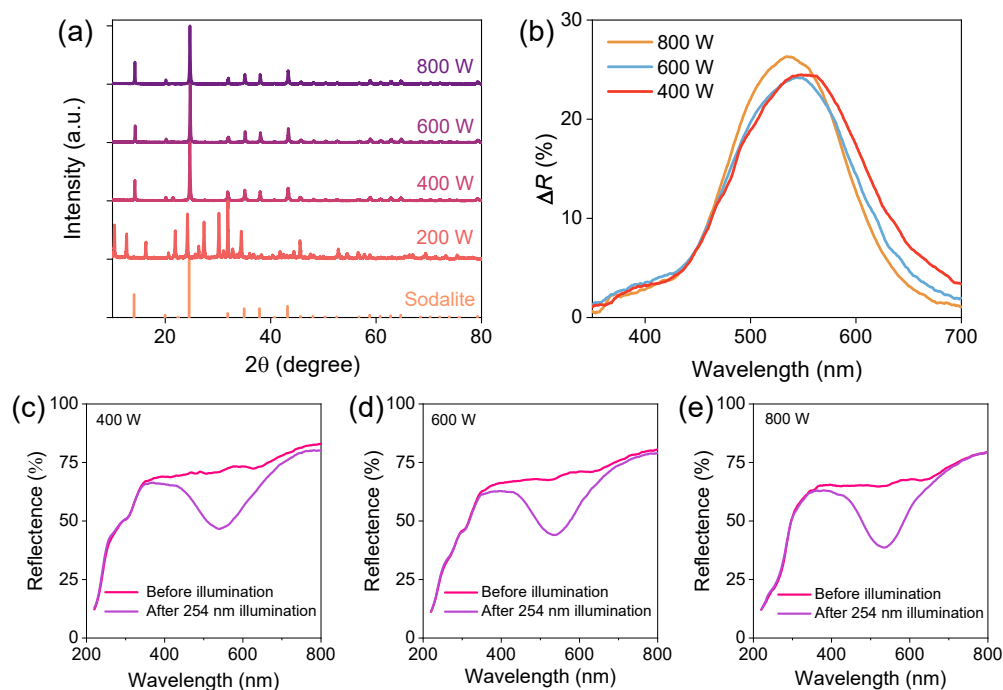

**Figure S2.** (a) XRD patterns of  $\text{Na}_8(\text{AlSiO}_4)_6\text{Cl}_2$  synthesized by MASS reactions using different power levels. (b) Reflectivity difference of  $\text{Na}_8(\text{AlSiO}_4)_6\text{Cl}_2$  synthesized with different power levels before and after 254 nm illumination. Reflectivity spectra of

$\text{Na}_8(\text{AlSiO}_4)_6\text{Cl}_2$  synthesized using (c) 400 W, (d) 600 W, and (e) 800 W before and after 254 nm illumination.

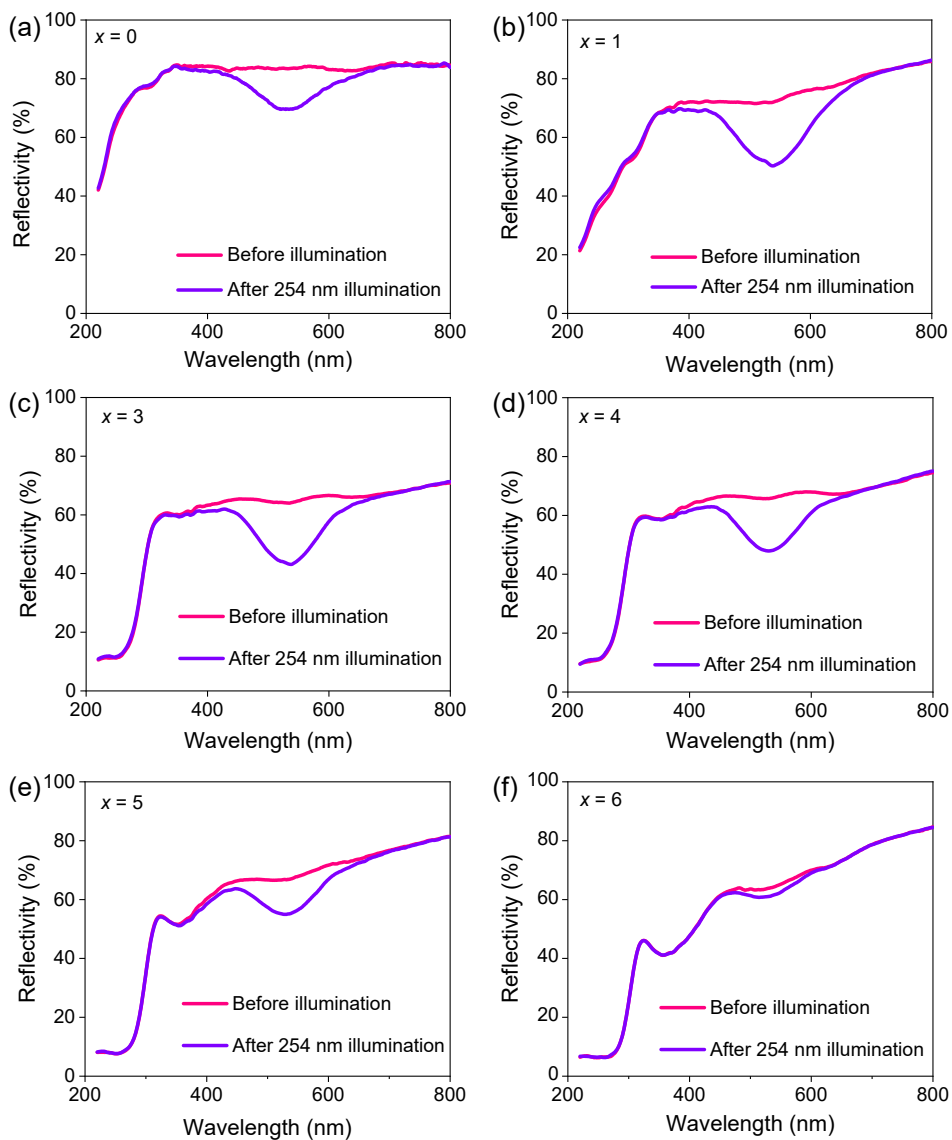

**Figure S3.** Reflectivity spectra of  $\text{Na}_8(\text{AlSiO}_4)_6\text{Cl}_{2-0.3x}\text{S}_{0.15x}$  synthesized by MASS reactions before and after 254 nm illumination with (a)  $x = 0$ , (b)  $x = 1$ , (c)  $x = 3$ , (d)  $x = 4$ , (e)  $x = 5$ , and (f)  $x = 6$ .

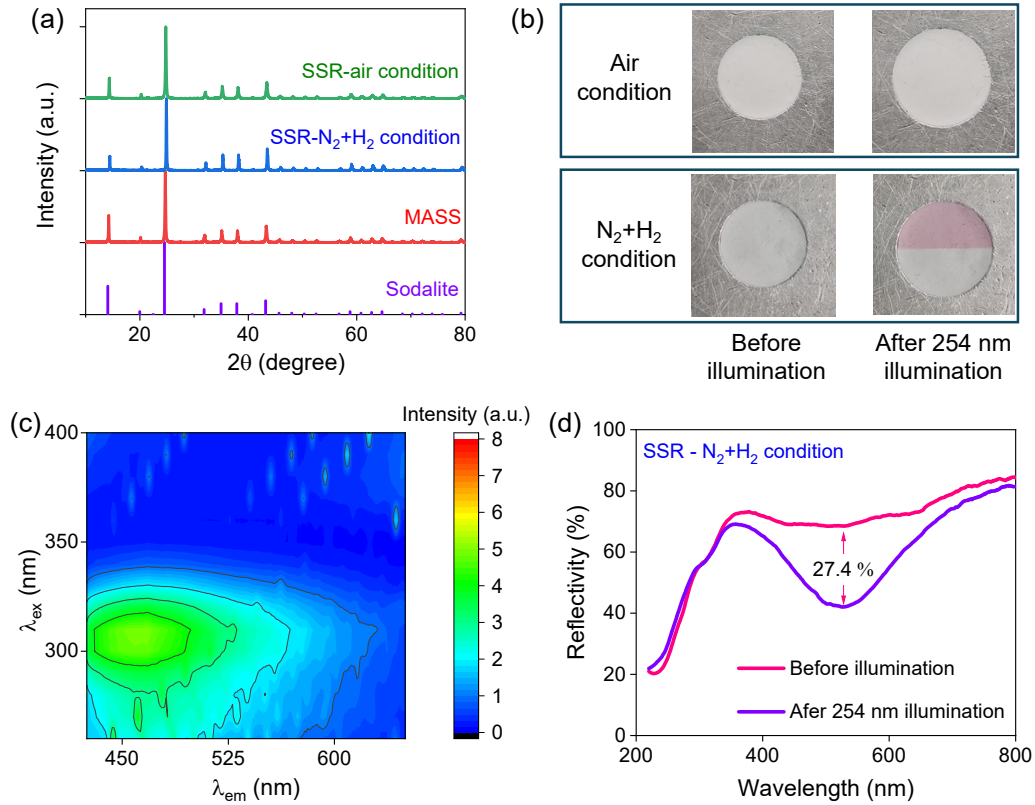

**Figure S4.** (a) XRD patterns of  $\text{Na}_8(\text{AlSiO}_4)_6\text{Cl}_{1.4}\text{S}_{0.3}$  synthesized by different methods. (b) Photographs of  $\text{Na}_8(\text{AlSiO}_4)_6\text{Cl}_{1.4}\text{S}_{0.3}$  synthesized by solid-state reactions (SSR) in different conditions before and after 254 nm illumination. (c) Contour plot of the excitation-dependent photoluminescence emission spectra of  $\text{Na}_8(\text{AlSiO}_4)_6\text{Cl}_{1.4}\text{S}_{0.3}$  synthesized by SSR in  $\text{N}_2+\text{H}_2$  condition. (d) Reflectivity spectra of  $\text{Na}_8(\text{AlSiO}_4)_6\text{Cl}_{1.4}\text{S}_{0.3}$  synthesized by SSR in  $\text{N}_2+\text{H}_2$  condition before and after 254 nm illumination.

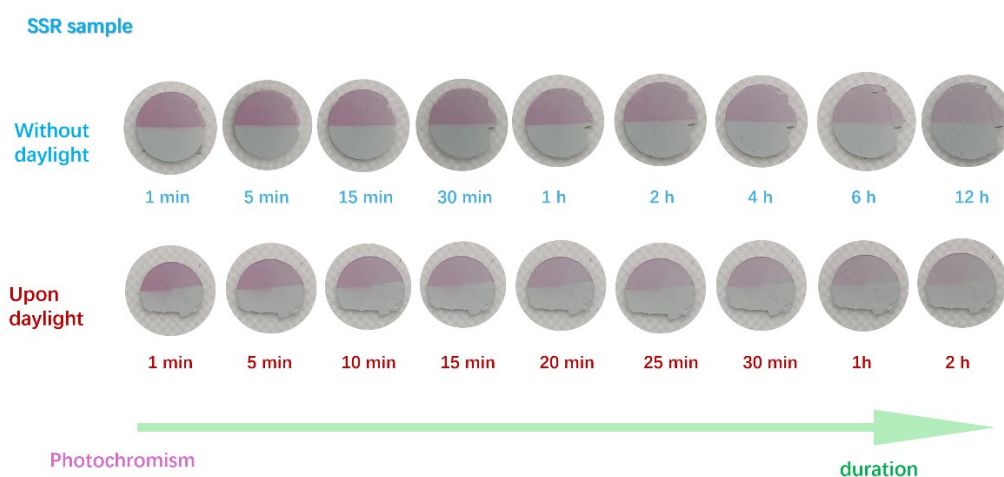

**Figure S5.** Stability of the photochromic sample ( $\text{Na}_8(\text{AlSiO}_4)_6\text{Cl}_{1.4}\text{S}_{0.3}$ ) prepared by SSR method. Photochromic samples were put upon daylight or without daylight (in darkness) for varied durations at room temperature.

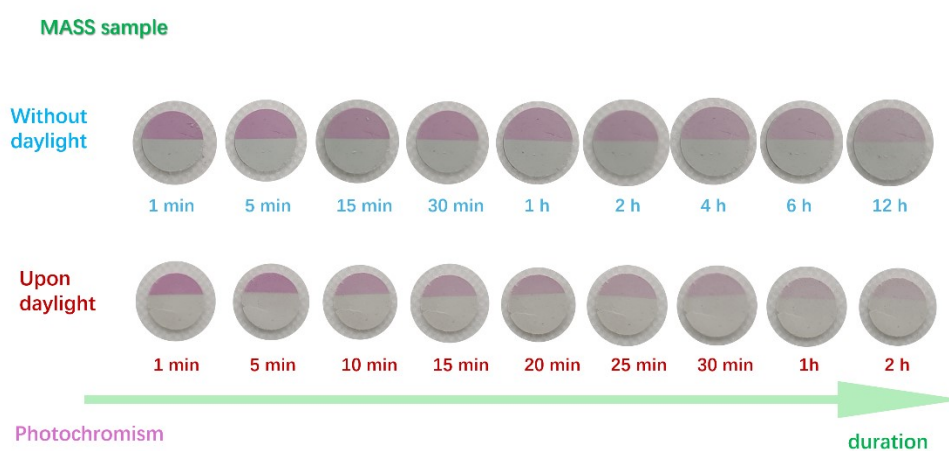

**Figure S6.** Stability of the photochromic sample ( $\text{Na}_8(\text{AlSiO}_4)_6\text{Cl}_{1.4}\text{S}_{0.3}$ ) prepared by MASS method. Photochromic samples were put upon daylight or without daylight (in darkness) for varied durations at room temperature.
